# Supplementary material for: Characterization of a thalamic nucleus mediating habenula responses to changes in ambient illumination
Source: PubMed Central journal article supplement (PMC5670518; doi:10.1186/s12915-017-0431-1), 2017-10-31

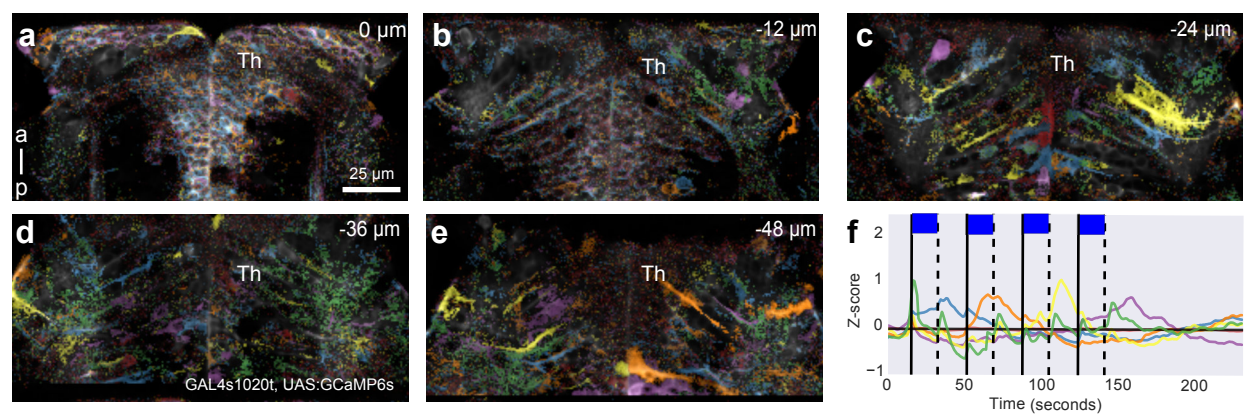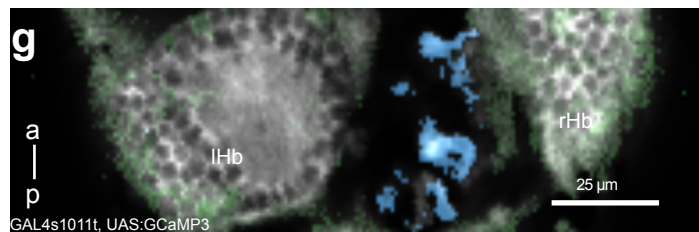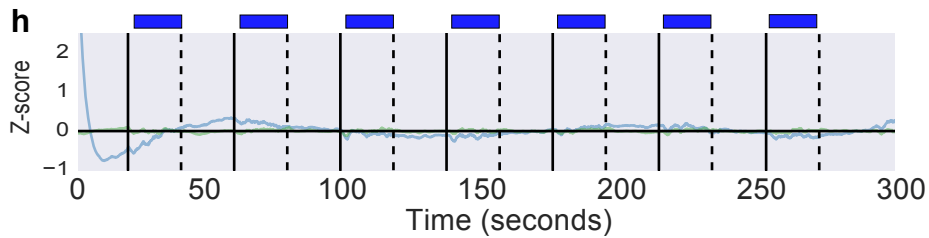

Supplement: 12915_2017_431_MOESM8_ESM.pdf [file 12915_2017_431_MOESM8_ESM.pdf]
